# Supplementary material for: Ultrafine-grained Ni-rich layered cathode for advanced Li-ion batteries
Source: Royal Society of Chemistry journal article supplement (doi:10.1039/d1ee02898g), 2021-01-01
Supplement: d1ee02898g1.pdf [file d1ee02898g1.pdf]

1

## Electronic Supplementary Information (ESI)

2

### 3 **Ultrafine-grained Ni-rich layered cathode for advanced Li-ion batteries**

4 Geon-Tae Park,<sup>a</sup> Dae Ro Yoon,<sup>a</sup> Un-Hyuck Kim,<sup>a</sup> Been Namkoong,<sup>a</sup> Junghwa Lee,<sup>b</sup> Melody M. Wang,<sup>b</sup> Andrew C.  
5 Lee,<sup>b</sup> X. Wendy Gu,<sup>c</sup> William C. Chueh,<sup>b</sup> Chong S. Yoon,<sup>\*d</sup> and Yang-Kook Sun<sup>\*a</sup>

6

7 <sup>a</sup> Department of Energy Engineering, Hanyang University, Seoul 04763, South Korea.

8 <sup>b</sup> Department of Materials Science and Engineering, Stanford University, Stanford, California 94305, United  
9 States.

10 <sup>c</sup> Department of Mechanical Engineering, Stanford University, Stanford, California 94305, United States.

11 <sup>d</sup> Department of Materials Science and Engineering, Hanyang University, Seoul 04763, South Korea.

12

13 Corresponding author: [csyoon@hanyang.ac.kr](mailto:csyoon@hanyang.ac.kr), [yksun@hanyang.ac.kr](mailto:yksun@hanyang.ac.kr).

14

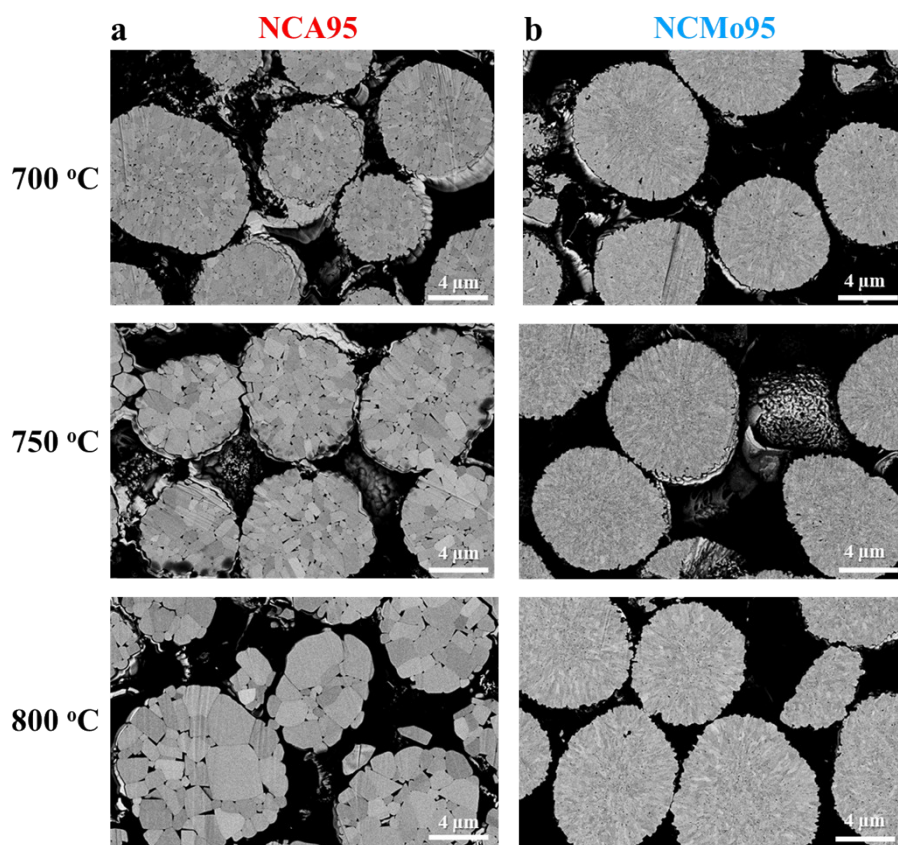

1

2 **Fig. S1.** Low-magnification cross-sectional SEM images of (a) NCA95 and (b) NCMo95 cathodes  
3 lithiated at 700, 750, and 800 °C for 10 h.

4

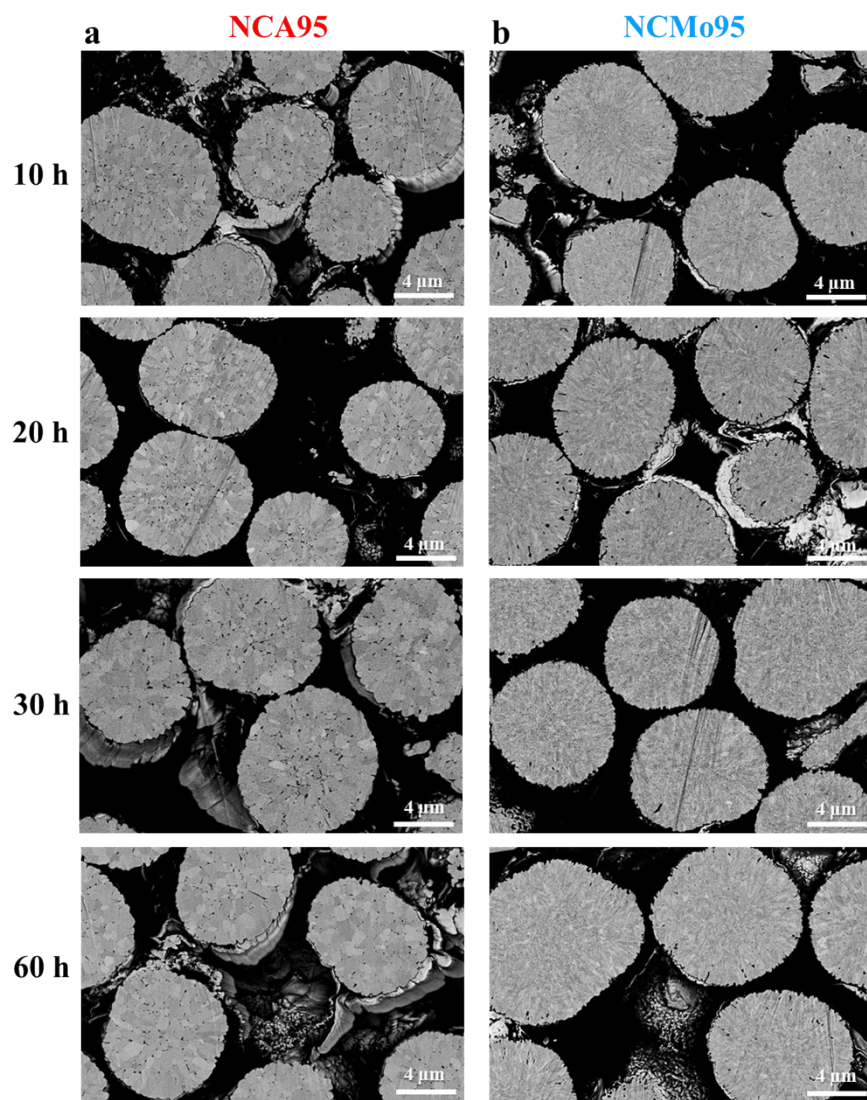

1

2 **Fig. S2.** Low-magnification cross-sectional SEM images of (a) NCA95 and (b) NCMo95 cathodes  
3 lithiated at 700 °C for 10, 20, 30, and 60 h.

4

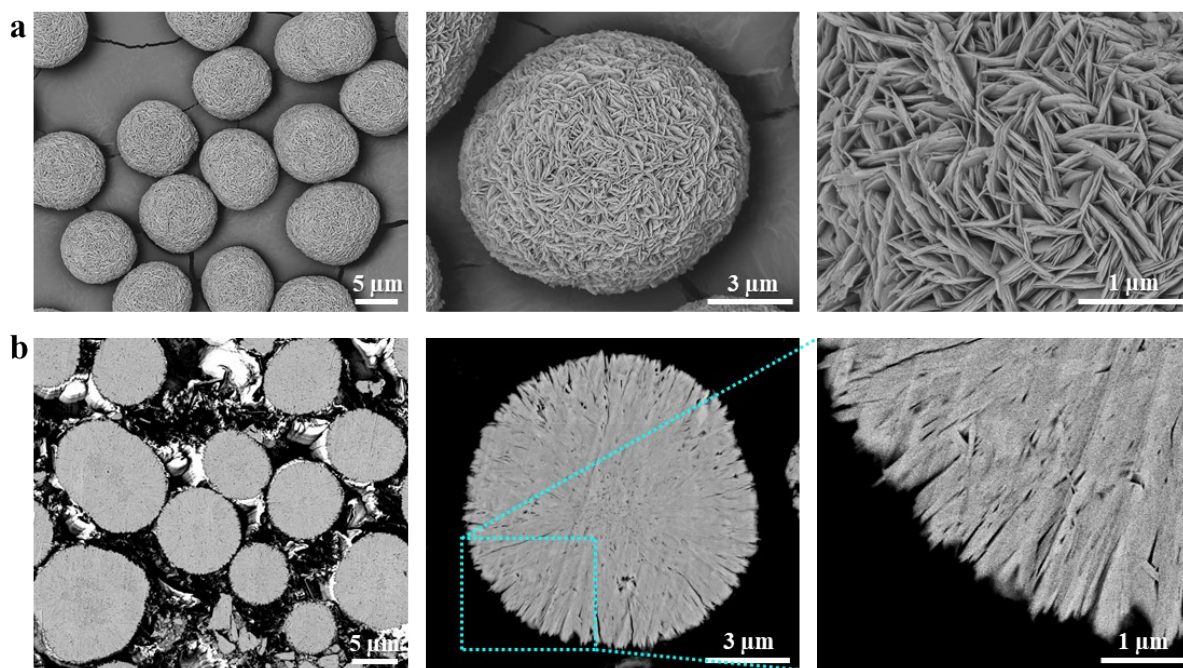

1

2 **Fig. S3.** (a) Surface and (b) cross-sectional SEM images of  $[\text{Ni}_{0.96}\text{Co}_{0.04}](\text{OH})_2$  precursor.

3

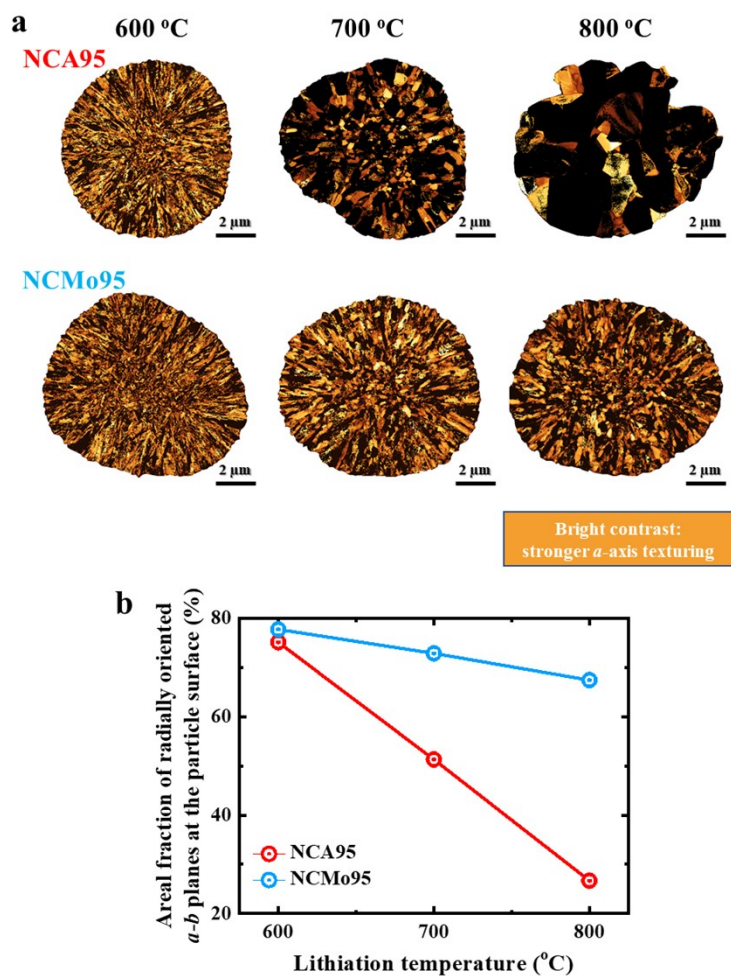

1

2 **Fig. S4.** Orientation of primary particles as a function of lithiation temperature. (a) ASTAR images and  
 3 (b) areal fraction of radially oriented *a-b* planes at the particle surfaces (within 3 μm from the surface)  
 4 of NCA95 and NCMo95 cathode particles lithiated at 600, 700, and 800 °C for 10 h, indicating that the  
 5 *a-b* plane orientation of primary particles decreases with increasing lithiation temperature.

6

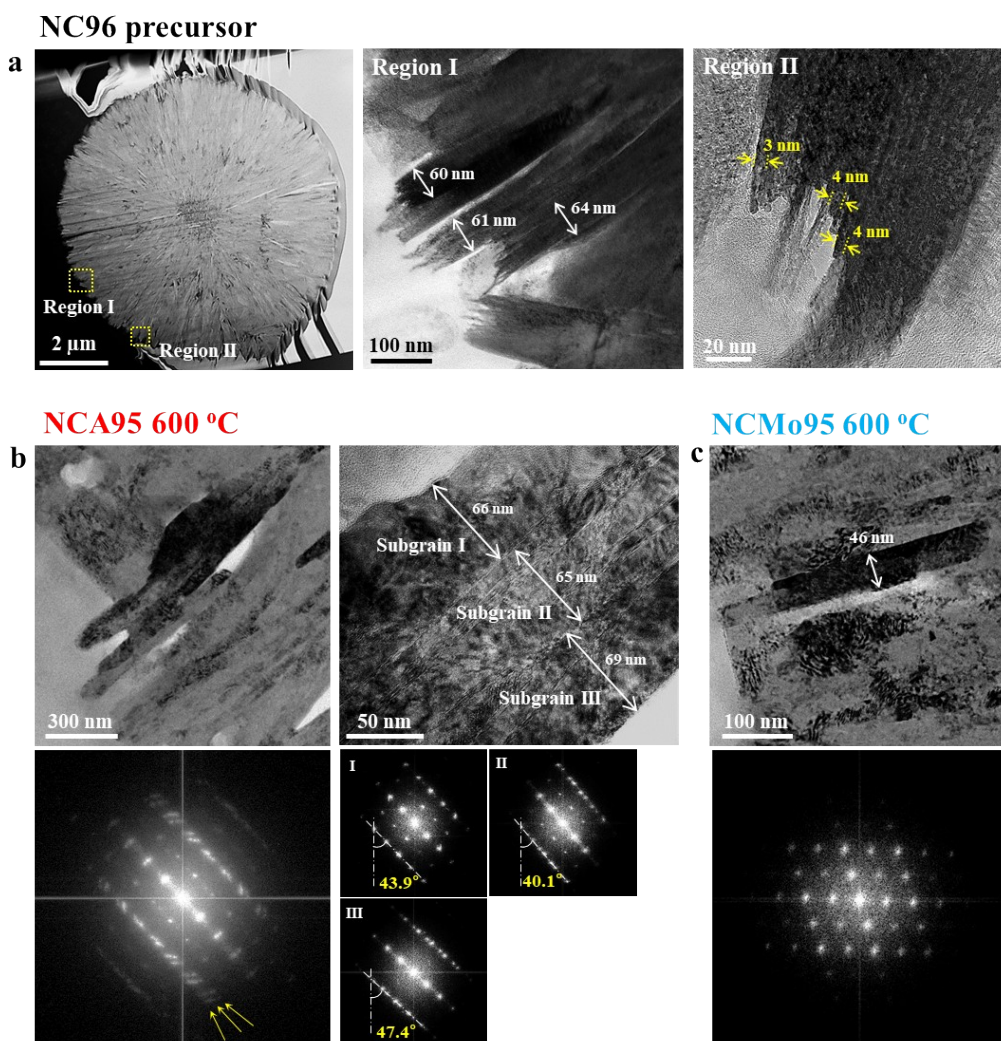

1

2 **Fig. S5.** Coarsening of  $[\text{Ni}_{0.96}\text{Co}_{0.04}](\text{OH})_2$  primary particles under high-temperature lithiation  
 3 (evolution of NCA95 and NCMo95 primary particles). (a) Dark-field STEM image and high-  
 4 magnification TEM images (Region I and II) of  $[\text{Ni}_{0.96}\text{Co}_{0.04}](\text{OH})_2$  precursor. Bright-field, high-  
 5 resolution TEM image and corresponding fast Fourier transform (FFT) of (b) NCA95 (including an  
 6 SAED pattern) and (c) NCMo95 lithiated at 600 °C for 10 h.

7

8

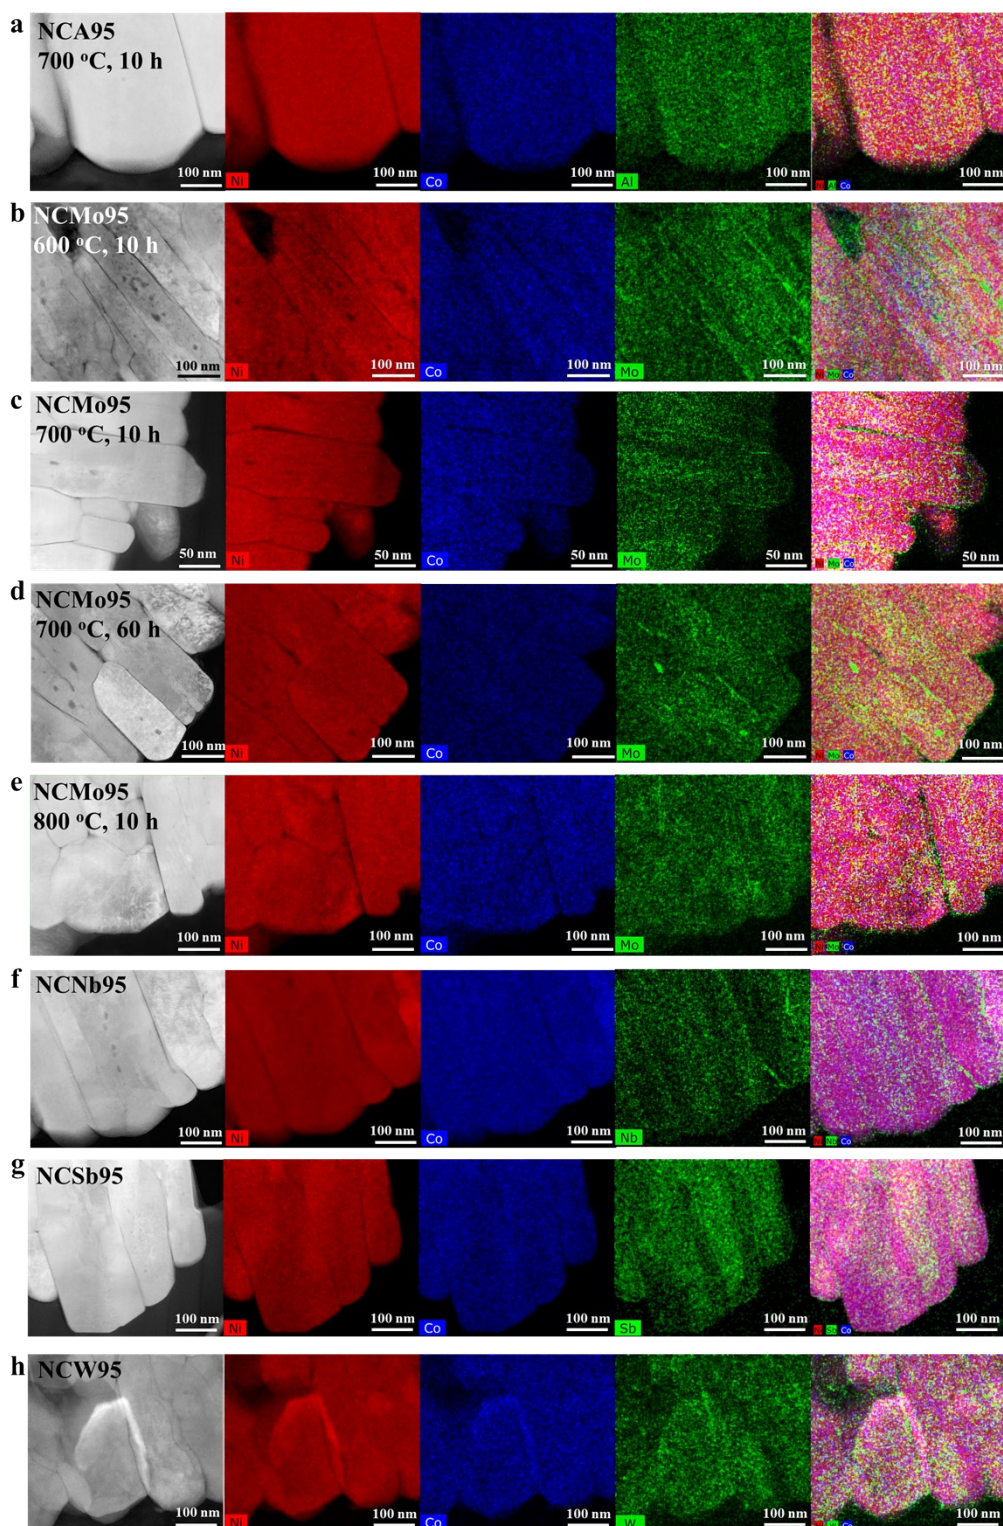

1

2 **Fig. S6.** TEM-EDX elemental maps of an (a) NCA95 cathode lithiated at 700 °C for 10 h; NCMo95  
 3 cathode lithiated at (b) 600 °C for 10 h, (c) 700 °C for 10 h, (d) 700 °C for 60 h, and (e) 800 °C for 10  
 4 h; (f) NCNb95 lithiated at 700 °C for 10 h; (g) NCSb95 lithiated at 700 °C for 10 h; and (h) NCW95  
 5 lithiated at 700 °C for 10 h. This figure illustrates the segregation of sintering inhibitor dopants (Mo,  
 6 Nb, Sb, W) at cathode grain boundaries.

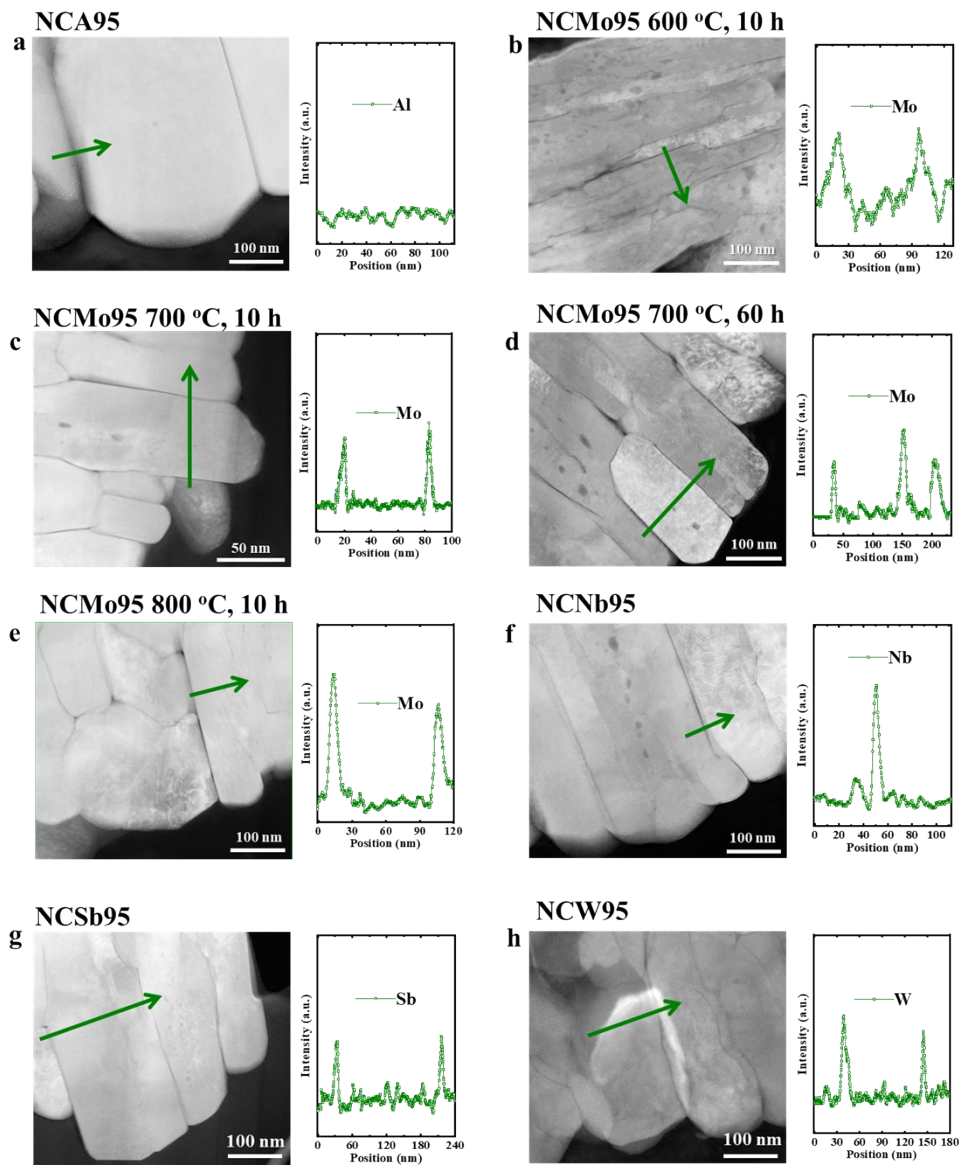

1

2 **Fig. S7.** TEM-EDX elemental line spectra (right) and corresponding dark-field STEM images (left) of  
 3 (a) NCA95 lithiated at 700 °C for 10 h; NCMo95 lithiated at (b) 600 °C for 10 h, (c) 700 °C for 10 h,  
 4 (d) 700 °C for 60 h, and (e) 800 °C for 10 h; (f) NCMo95 lithiated at 700 °C for 10 h; (g) NCSb95  
 5 lithiated at 700 °C for 10 h; and (h) NCW95 lithiated at 700 °C for 10 h. This figure illustrates the  
 6 segregation of sintering inhibitor dopants (Mo, Nb, Sb, W) at cathode grain boundaries.

7



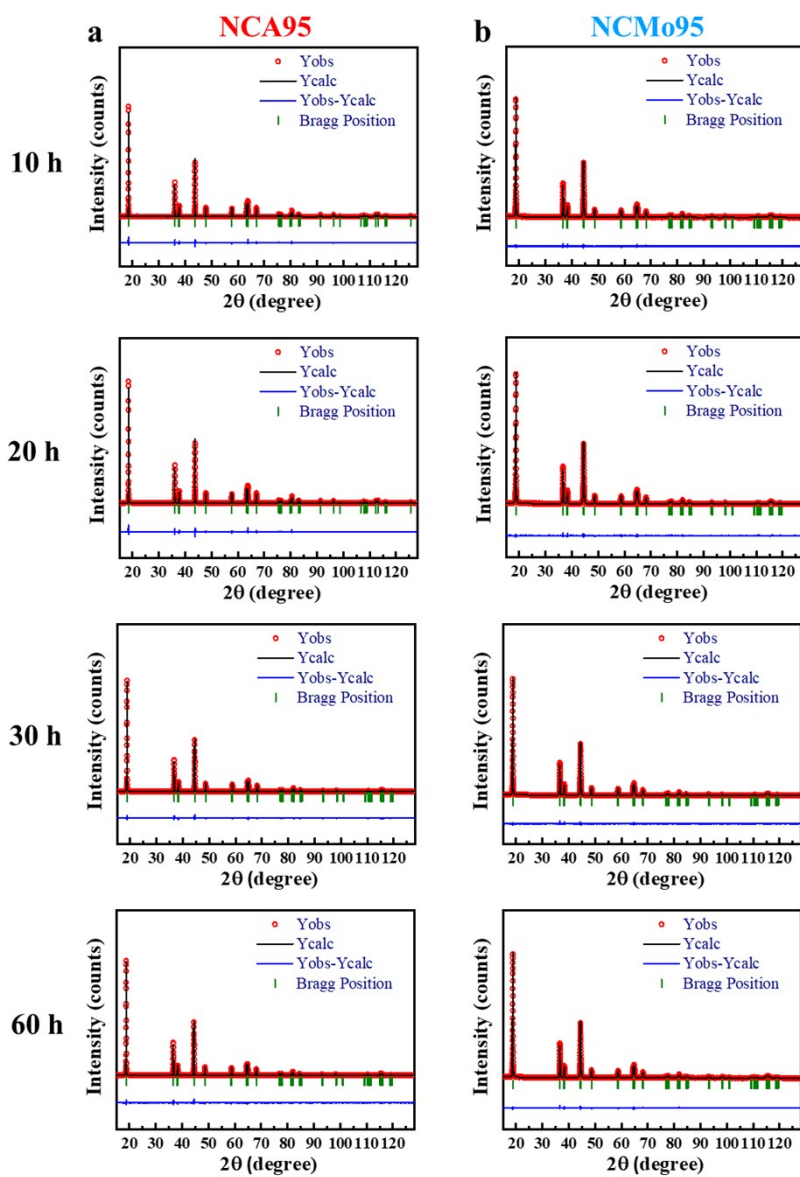

1

2 **Fig. S8.** Rietveld refinement results for (a) NCA95 and (b) NCMo95 cathodes lithiated at 700 °C for  
 3 10, 20, 30, and 60 h.

4

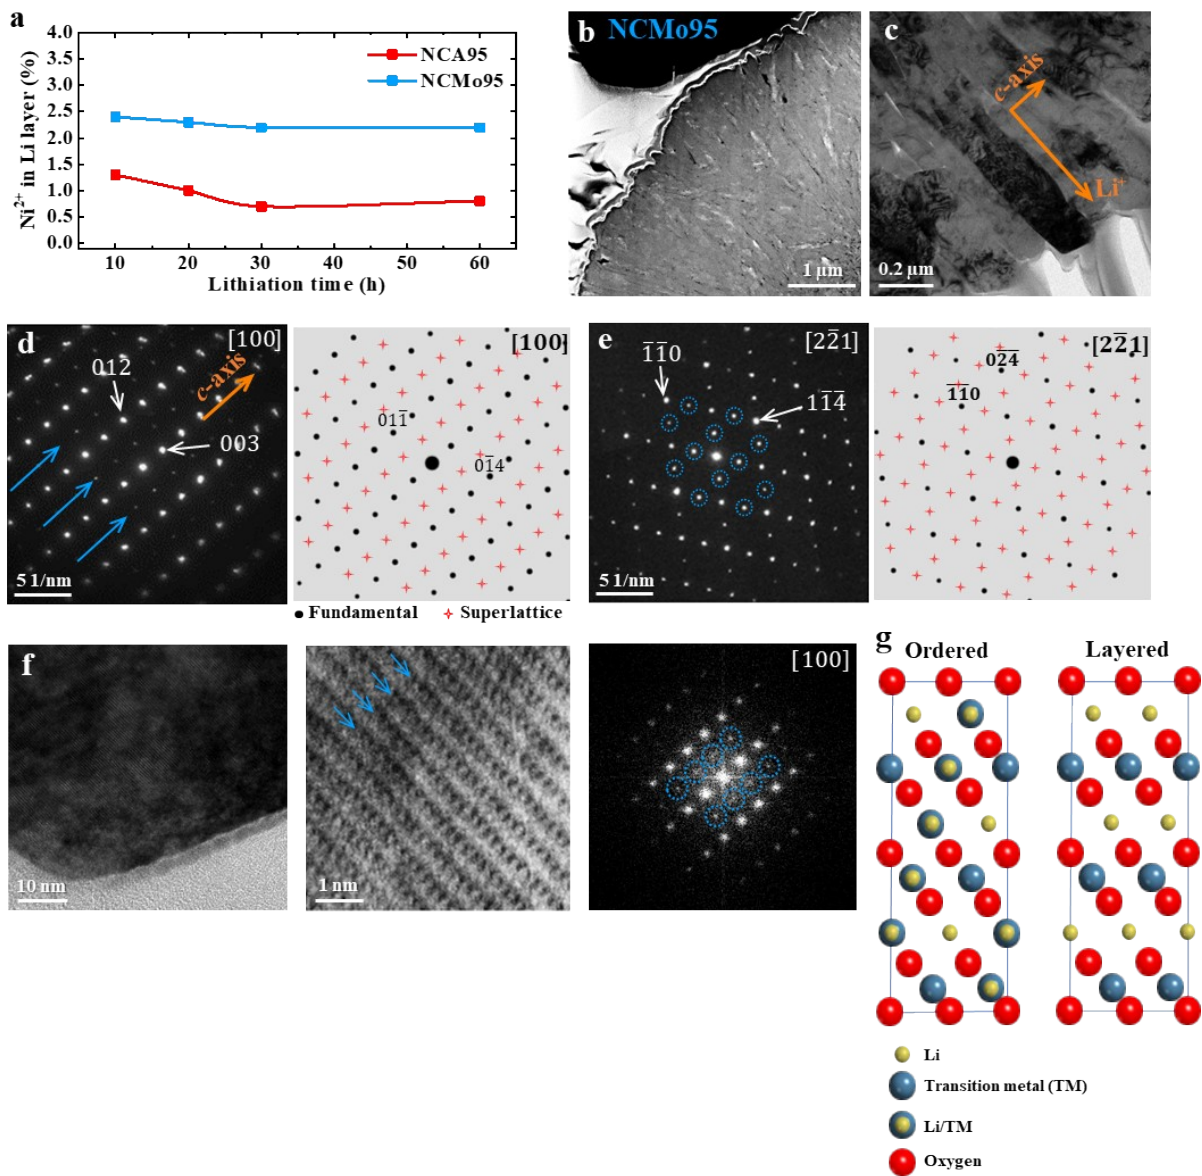

1

2 **Fig. S9.** Li/TM cation-ordered structure and secondary phase observed for a NCMo95 cathode lithiated  
 3 at 700 °C for 10 h. (a) Percentage of Ni<sup>2+</sup> in the Li layer of NCA95 and NCMo95 cathodes lithiated for  
 4 10, 20, 30, and 60 h. (b) Dark-field cross-sectional STEM image of an NCMo95 cathode and (c) high-  
 5 magnification TEM image of an elongated primary particle of an NCMo95 cathode. SAED pattern (left)  
 6 and simulated diffraction patterns along the (d) [100] and (e) [221] zone axes (right) of a Li/TM cation-  
 7 ordered structure (superlattice spots distinct from the normal layered structure are marked in blue and  
 8 red). (f) HR and HAADF TEM images together with a fast Fourier transform of the NCMo95 primary  
 9 particle from (c). (g) Schematic image of Li/TM cation-ordered structure and normal layered structure.

10

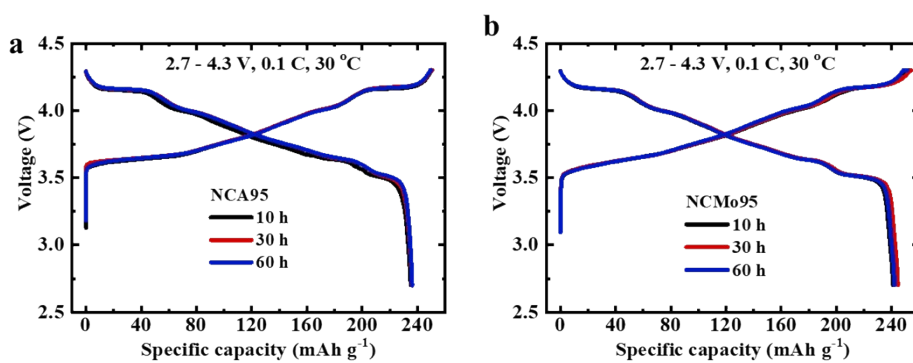

1

2 **Fig. S10.** Initial charge–discharge curves of half-cells cycled at 0.1 C and 30 °C in the voltage range of  
 3 2.7–4.3 V, featuring (a) NCA95 and (b) NCMo95 cathodes lithiated at 700 °C for 10, 30, and 60 h.

4

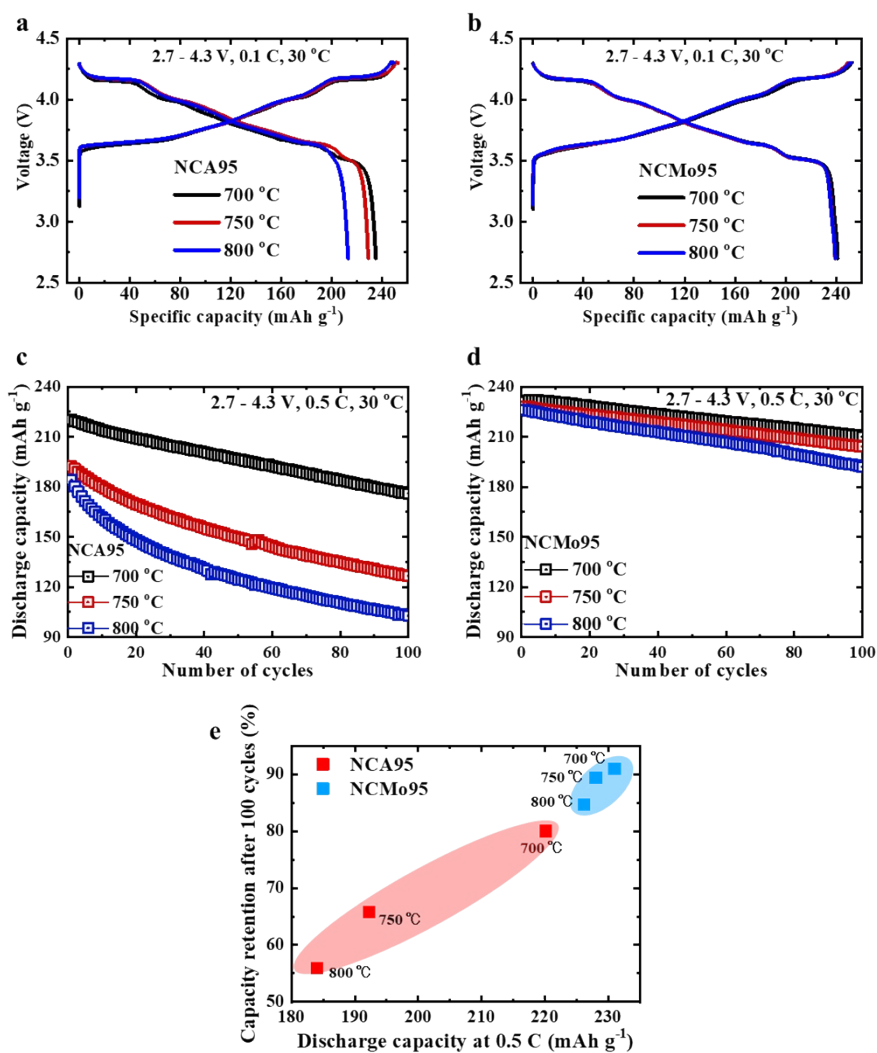

1

2 **Fig. S11.** Initial charge–discharge characteristics of half-cells cycled at 0.1 C and 30 °C in the range of  
 3 2.7–4.3 V featuring (a) NCA95 and (b) NCMo95 cathodes lithiated at 700, 750, and 800 °C for 10 h.  
 4 Cycling performance (at 0.5 C) of the (c) NCA95 and (d) NCMo95 cathodes lithiated at 700, 750, 800  
 5 °C for 10 h. (e) Plot of the capacity retention after 100 cycles versus discharge capacity (at 0.5 C) for  
 6 NCA95 and NCMo95 cathodes lithiated at various temperatures.

7

## Discharge rate capability

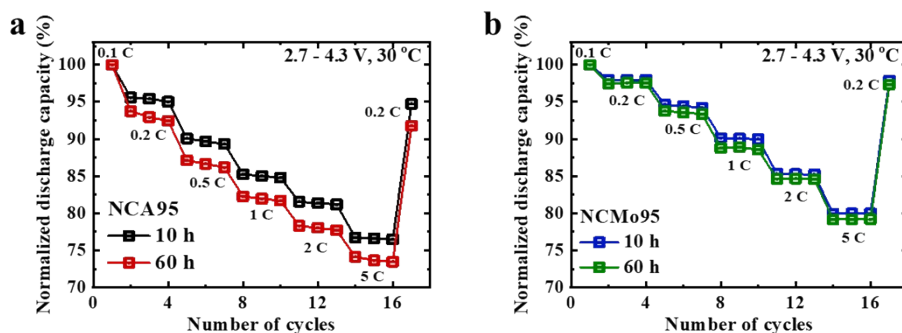

## Charge rate capability

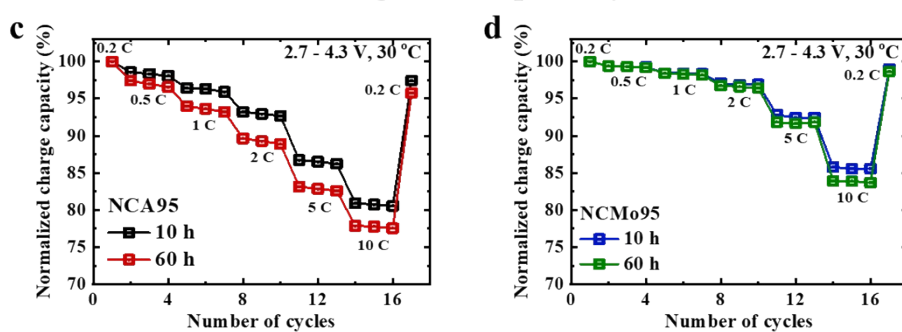

1

2 **Fig. S12.** Comparison of the discharge rate capabilities of half-cells featuring (a) NCA95 and (b)  
 3 NCMo95 cathodes lithiated at 700 °C for 10 and 60 h. Comparison of the charge rate capabilities of  
 4 half-cells featuring (c) NCA95 and (d) NCMo95 cathodes lithiated at 700 °C for 10 and 60 h.

5

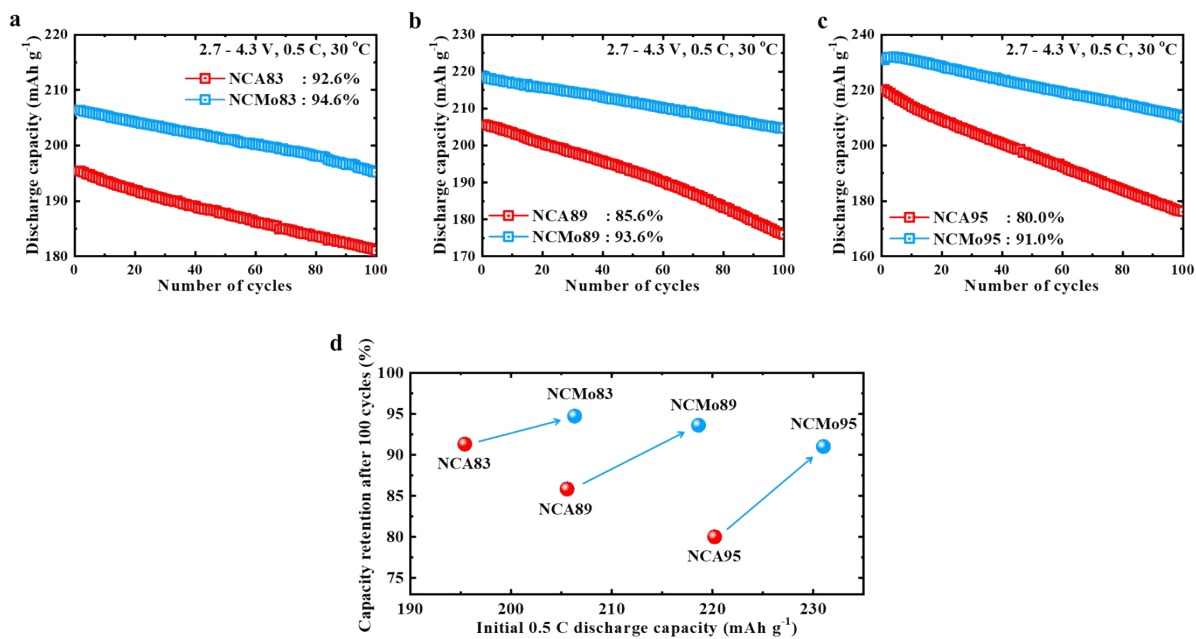

1

2 **Fig. S13.** Comparisons of the cycling performances (at 0.5 C) of half-cells featuring (a) NCA83 and  
 3 NCMo83 cathodes, (b) NCA89 and NCMo89 cathodes, and (c) NCA95 and NCMo95 cathodes. (d)  
 4 Initial 0.5 C discharge capacity (at 0.5 C) versus cycle life achieved by various Ni-rich cathodes.

5

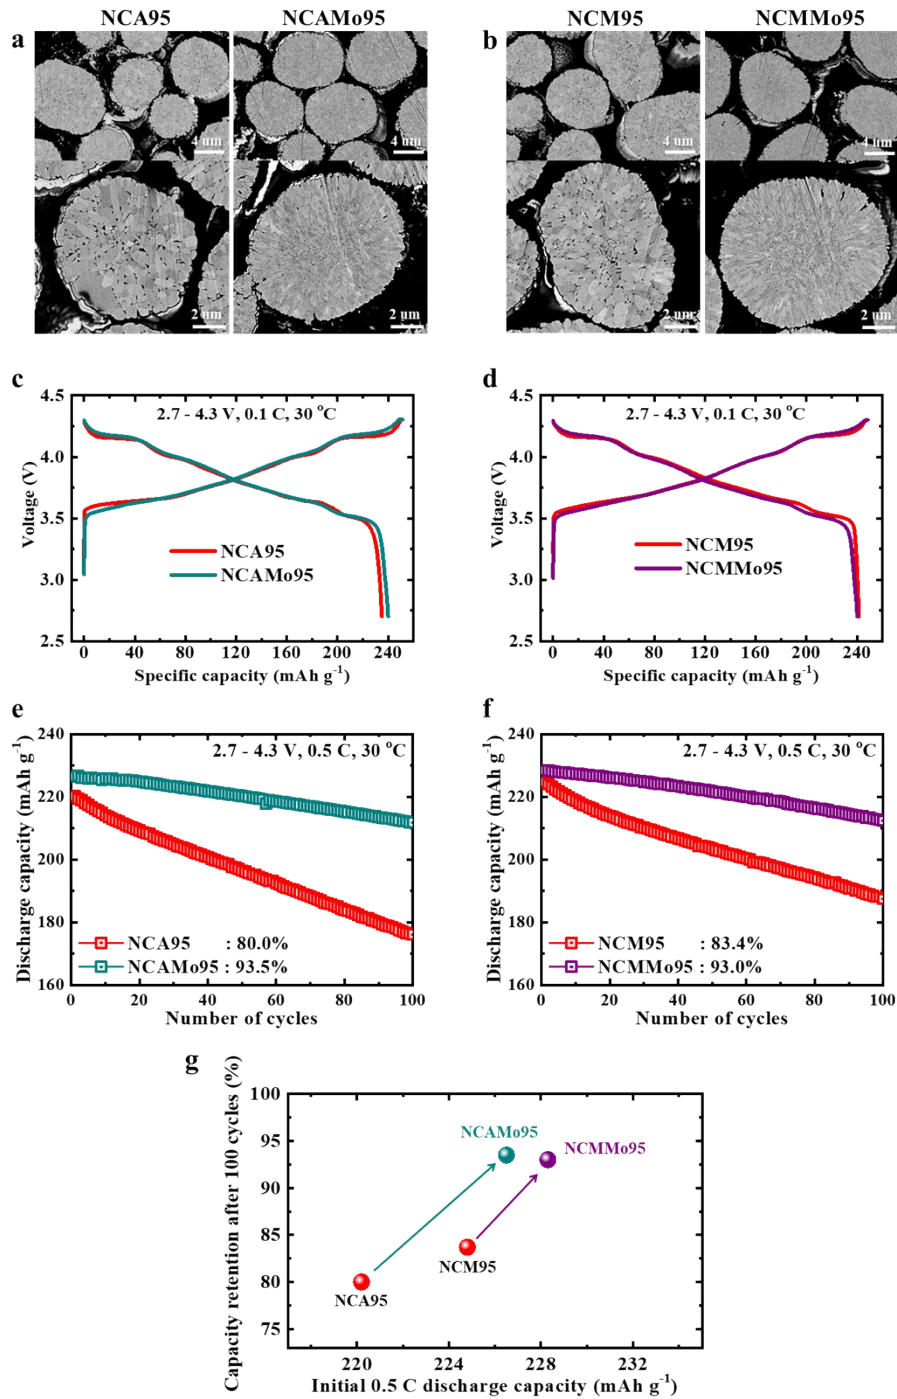

1

2 **Fig. S14.** Low-magnification cross-sectional SEM images of (a) NCA95,  $\text{Li}[\text{Ni}_{0.94}\text{Co}_{0.04}\text{Al}_{0.01}\text{Mo}_{0.01}]\text{O}_2$   
3 (hereinafter denoted as NCAMo95) and (b) NCM95,  $\text{Li}[\text{Ni}_{0.94}\text{Co}_{0.03}\text{Mn}_{0.02}\text{Mo}_{0.01}]\text{O}_2$  (hereinafter  
4 denoted as NCMMo95) cathodes lithiated at 700 °C for 10 h. Initial charge–discharge characteristics  
5 of half-cells cycled at 0.1 C and 30 °C in the range of 2.7–4.3 V featuring (c) NCA95, NCAMo95 and  
6 (d) NCM95, NCMMo95 cathodes lithiated at 700 °C for 10 h. Cycling performance (at 0.5 C) of the  
7 (e) NCA95, NCAMo95 and (f) NCM95, NCMMo95 cathodes lithiated at 700 °C for 10 h. (g) Initial  
8 0.5 C discharge capacity versus cycle life achieved by various Ni-rich cathodes.

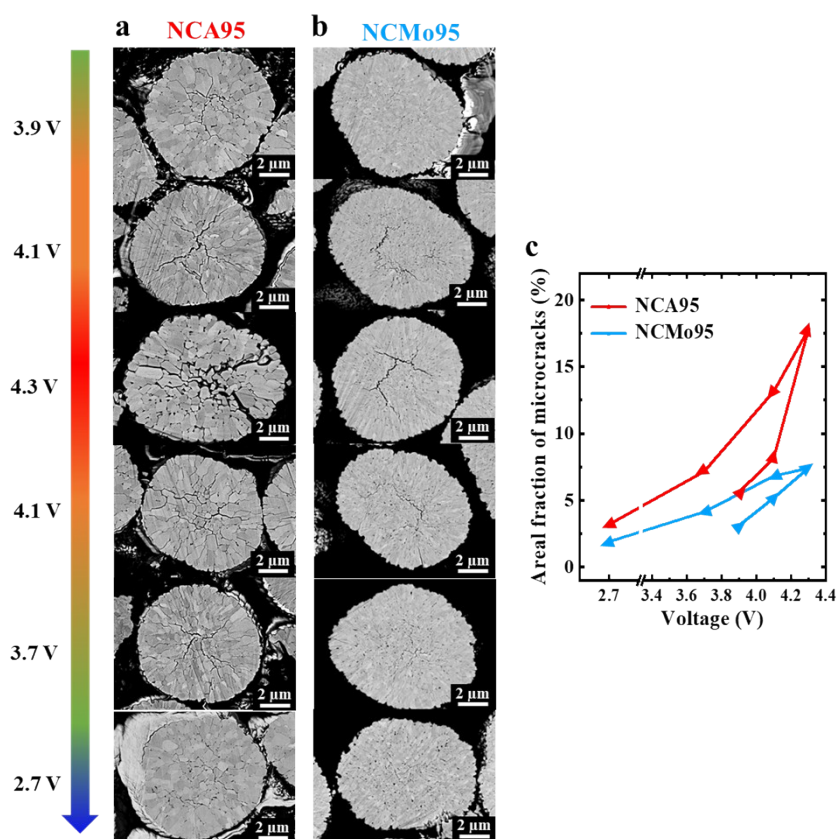

1

2 **Fig. S15.** Comparison of the cross-sectional SEM images of (a) NCA95 and (b) NCMo95 cathodes in  
 3 various states of charge (charged states: 3.9, 4.1, and 4.3 V; and discharged states: 4.1, 3.7, and 2.7 V  
 4 during initial cycles). (c) Comparison of the degree of microcracking of NCA95 and NCMo95 cathodes  
 5 as a function of cell voltage during initial cycles. The cathodes were lithiated at 700 °C for 10 h.

6



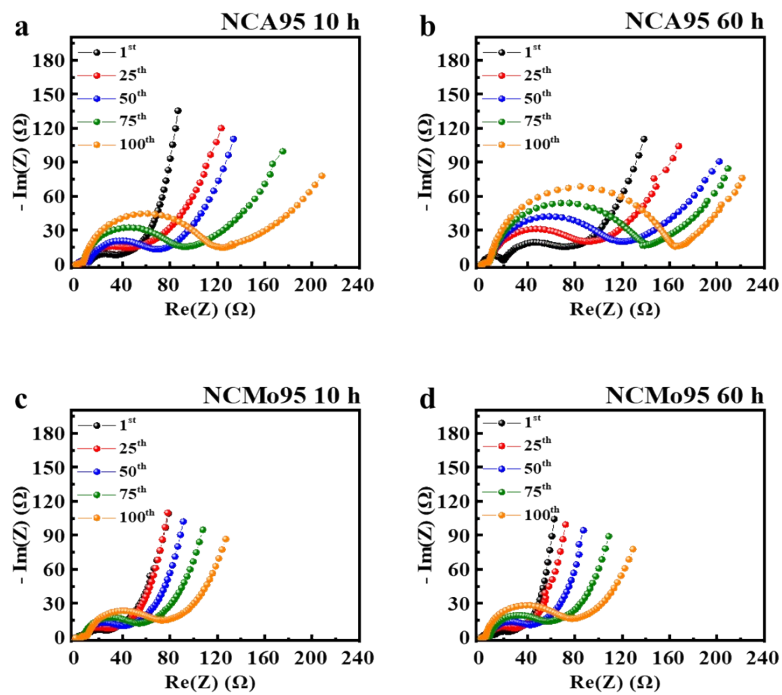

1

2 **Fig. S16.** Nyquist plots of the electrochemical impedances measured every 25 cycles for the NCA95  
 3 and NCMo95 cathodes subjected to different lithiation times. NCA95 lithiated at 700 °C for (a) 10 and  
 4 (b) 60 h. NCMo95 lithiated at 700 °C for (c) 10 and (d) 60 h.

5

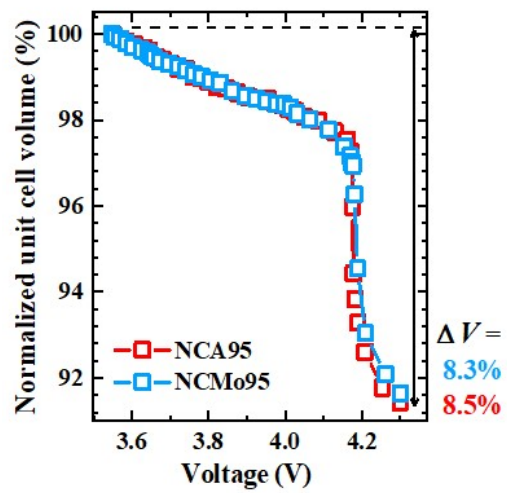

1

2 **Fig. S17.** Comparison of the unit cell volume changes for NCA95 and NCMo95 cathodes during the  
 3 first charge measured by *in situ* XRD. The cathodes were lithiated at 700 °C for 10 h.

4

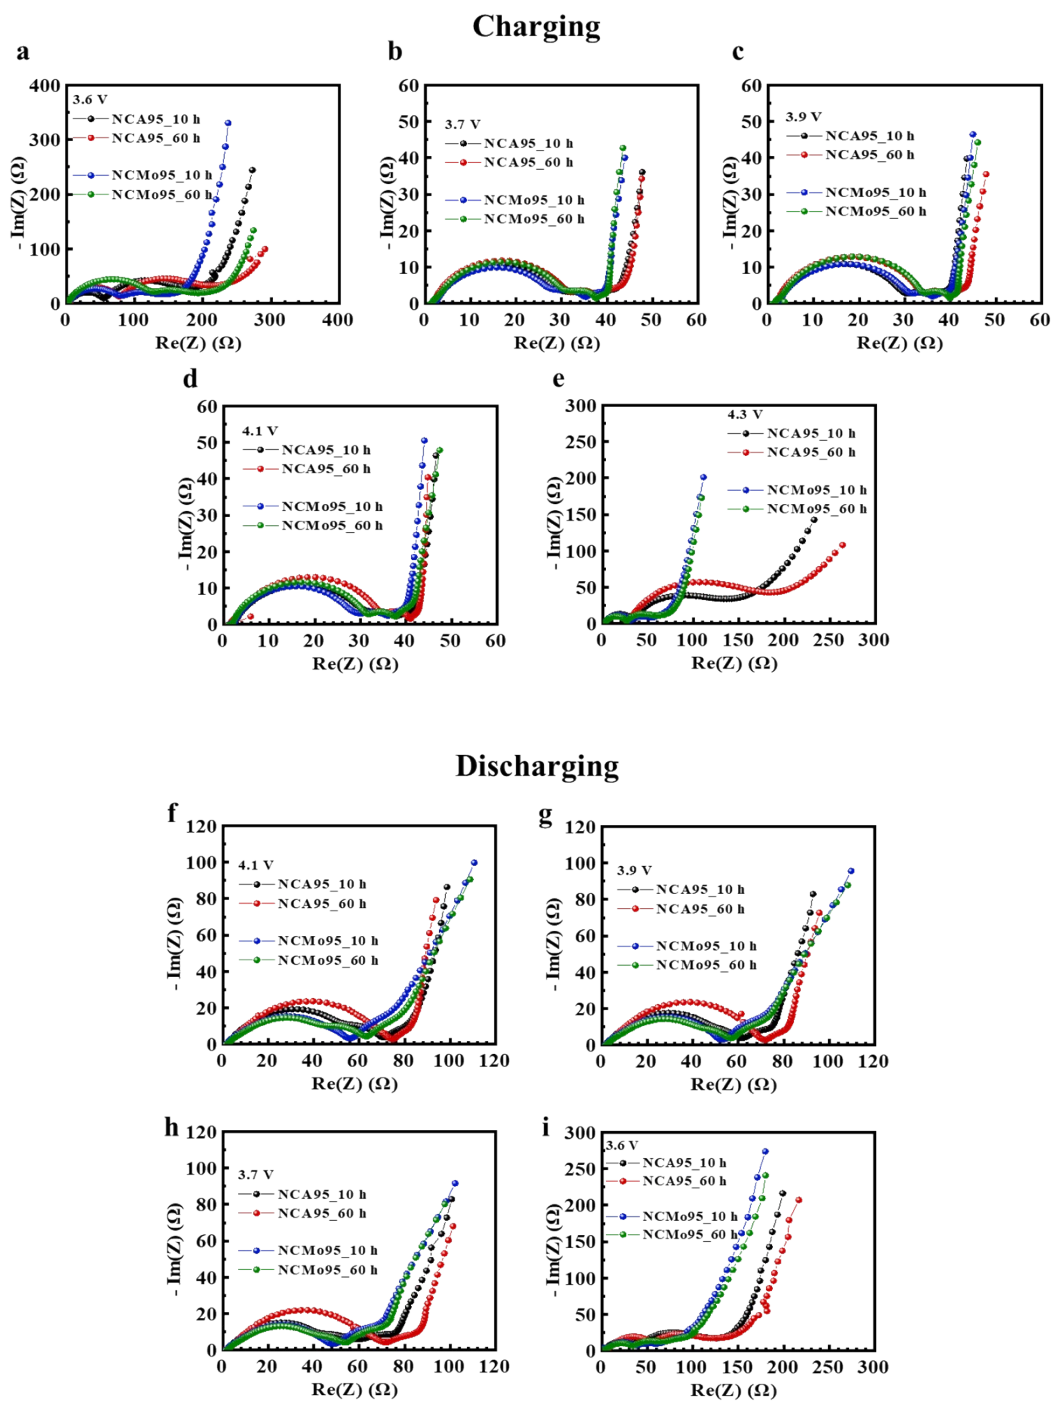

1

2 **Fig. S18.** Nyquist plots of NCA95 and NCMo95 cathodes (subjected to different lithiation times) in  
 3 various states of charge (charged states: (a) 3.6, (b) 3.7, (c) 3.9, (d) 4.1, and (e) 4.3 V; and discharged  
 4 states: (f) 4.1, (g) 3.9, (h) 3.7, and (i) 3.6 V).

5

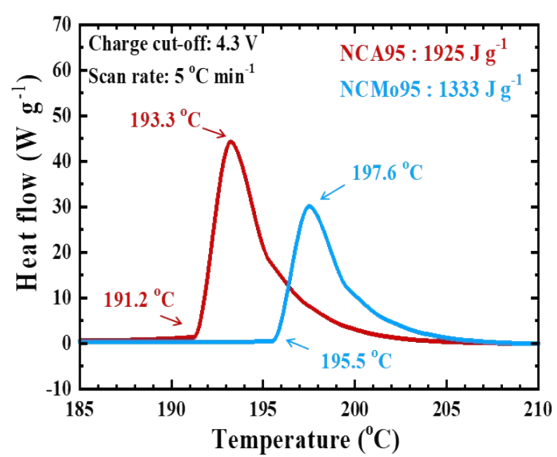

1

2 **Fig. S19.** DSC results of NCA95 and NCMo95 cathodes charged to 4.3 V. The cathodes were lithiated  
3 at 700 °C for 10 h.

4

Lithiated at 700 °C for 10 h

**NCA95**

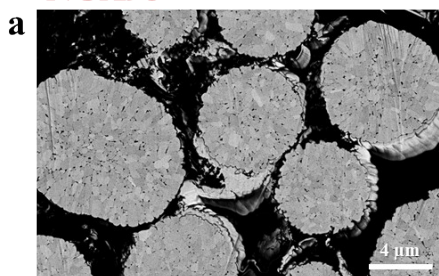

**NCTi95**

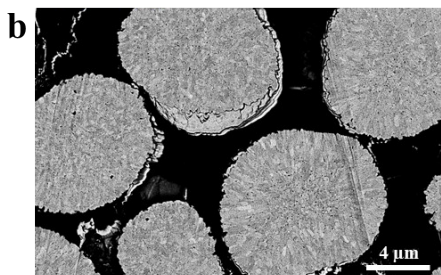

**NCTa95**

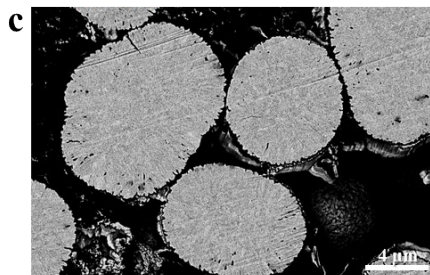

**NCSb95**

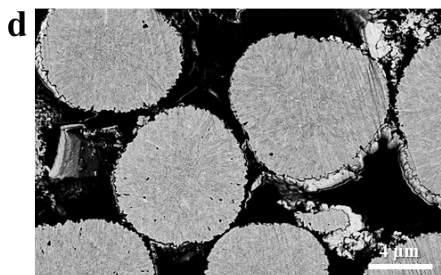

**NCNb95**

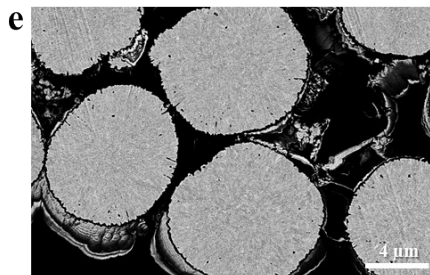

**NCW95**

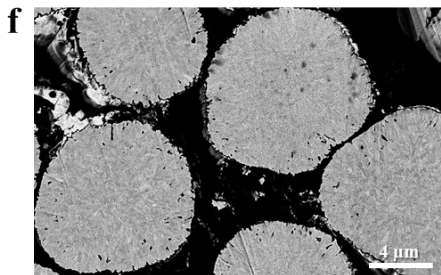

**NCMo95**

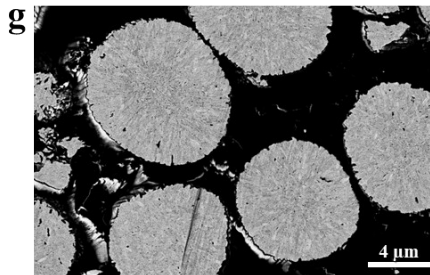

1

2 **Fig. S20.** Low-magnification cross-sectional SEM images of (a) NCA95, (b) NCTi95, (c) NCTa95, (d)  
3 NCSb95, (e) NCNb95, (f) NCW95, and (g) NCMo95 cathodes lithiated at 700 °C for 10 h.

4

Lithiated at 800 °C for 10 h

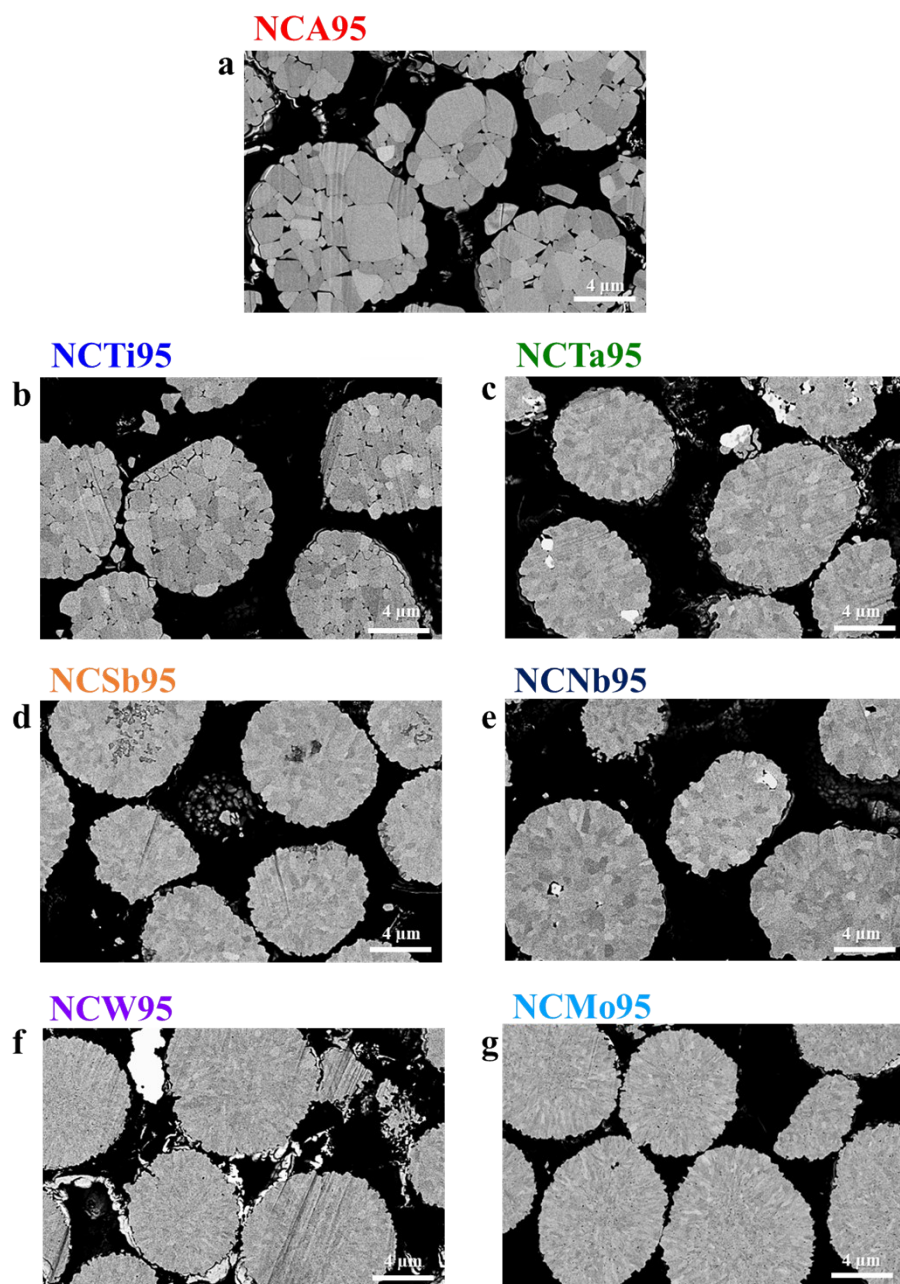

1

2 **Fig. S21.** Low-magnification cross-sectional SEM images of (a) NCA95, (b) NCTi95, (c) NCTa95, (d)  
3 NCSb95, (e) NCNb95, (f) NCW95, and (g) NCMo95 cathodes lithiated at 800 °C for 10 h.

4

Lithiated at 900 °C for 10 h

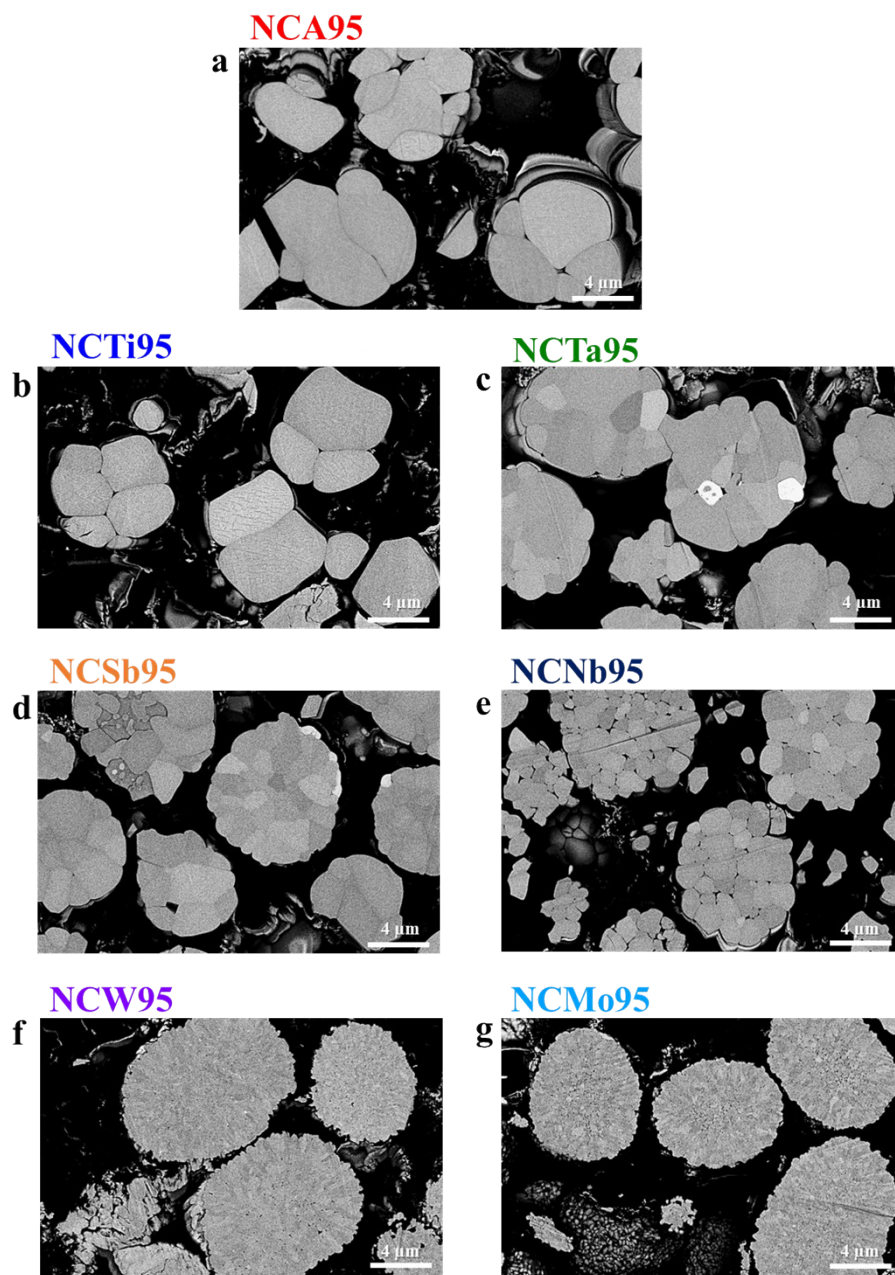

1

2 **Fig. S22.** Low-magnification cross-sectional SEM images of (a) NCA95, (b) NCTi95, (c) NCTa95, (d)  
3 NCSb95, (e) NCNb95, (f) NCW95, and (g) NCMo95 cathodes lithiated at 900 °C for 10 h.

4

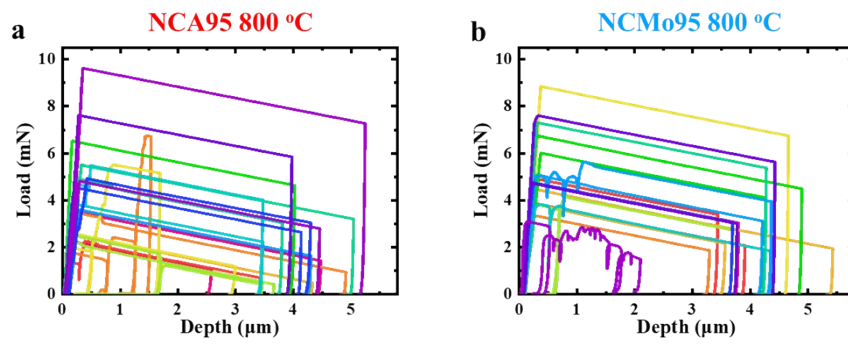

1

2 **Fig. S23.** Load-displacement curves of (a) NCA95, and (b) NCMo95 cathode particles lithiated at 800  
3 °C for 10 h.

4



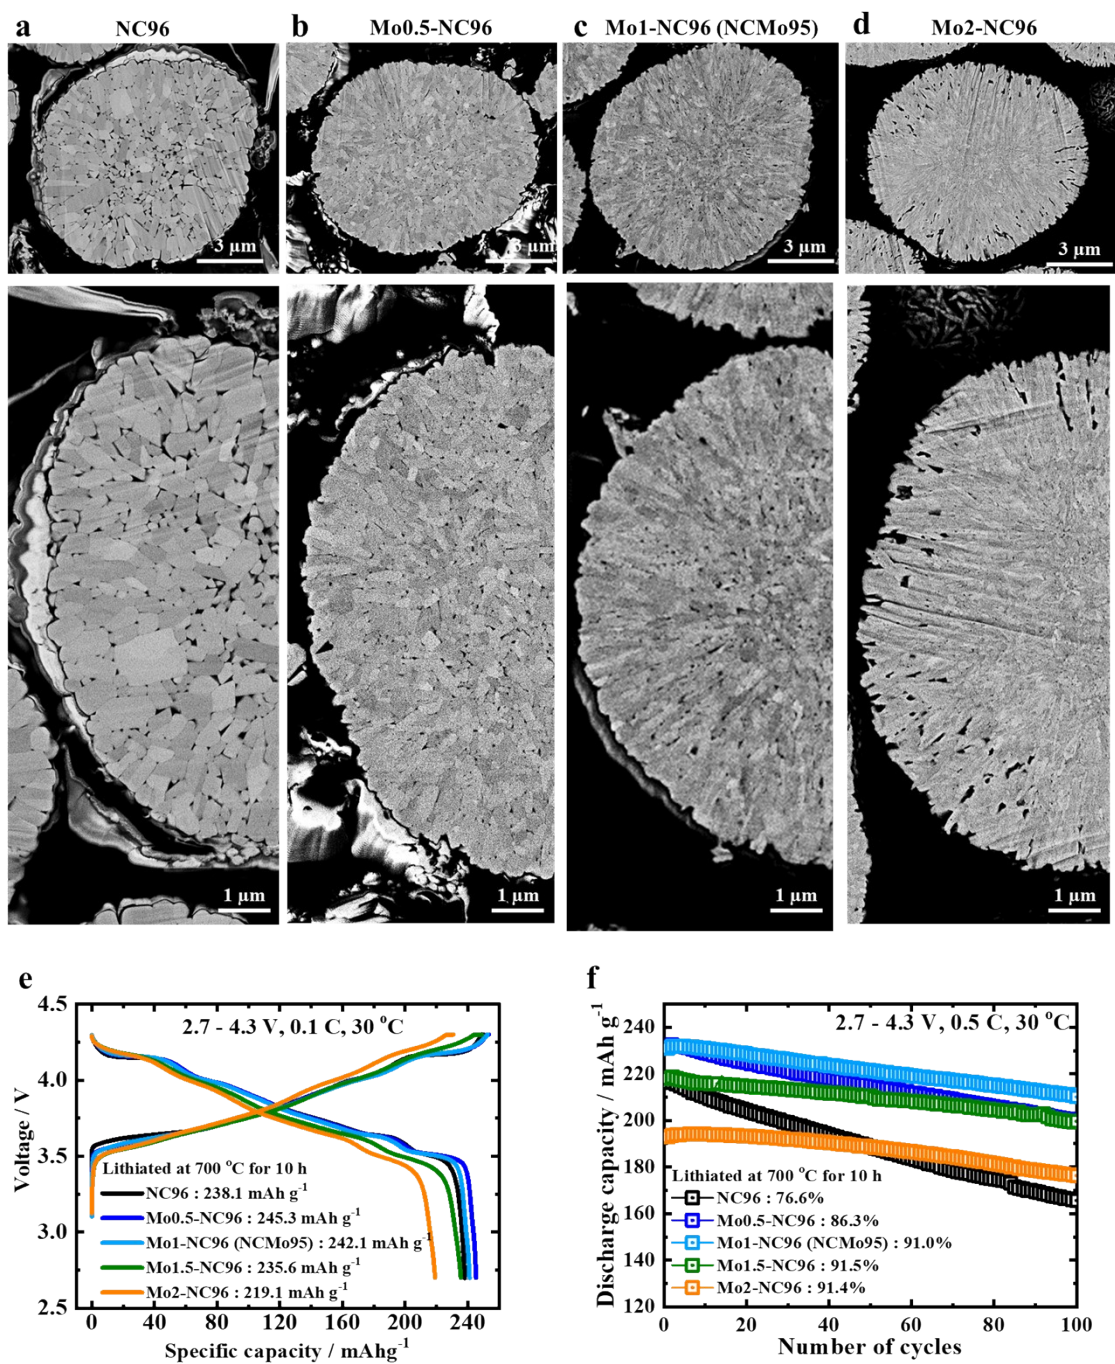

1

2 **Fig. S24.** Cross-sectional SEM images of (a) NC96, (b) Mo0.5-NC96, (c) Mo1-NC96, and (d) Mo2-  
 3 NC96 cathodes. (e) Initial charge–discharge characteristics and (f) cycling performance of half-cells  
 4 featuring a series of Mo-doped NC96 cathodes lithiated at 700 °C for 10 h.

5

1 **Table S1.** Chemical compositions of NCA95 and NCMo95 cathode powders lithiated at 700 °C for  
 2 10, 20, 30, and 60 h, as determined by ICP-OES.

| Sample | Lithiation temperature | Lithiation time | Ni (at%) | Co (at%) | Al (at%) | Mo (at%) |
|--------|------------------------|-----------------|----------|----------|----------|----------|
| NCA95  | 700 °C                 | 10 h            | 95.04    | 3.91     | 1.05     | -        |
|        |                        | 20 h            | 94.94    | 3.99     | 1.07     | -        |
|        |                        | 30 h            | 95.11    | 3.92     | 0.97     | -        |
|        |                        | 60 h            | 95.02    | 3.96     | 1.02     | -        |
| NCMo95 | 700 °C                 | 10 h            | 95.14    | 3.89     | -        | 0.97     |
|        |                        | 20 h            | 95.13    | 3.92     | -        | 0.95     |
|        |                        | 30 h            | 95.1     | 3.91     | -        | 0.99     |
|        |                        | 60 h            | 95.04    | 3.94     | -        | 1.02     |

3

4

1 **Table S2.** Structural parameters determined by Rietveld refinement of the X-ray diffraction data of  
 2 NCA95 cathodes lithiated at 700 °C for 10, 20, 30, and 60 h.

| Li[Ni <sub>0.95</sub> Co <sub>0.04</sub> Al <sub>0.01</sub> ]O <sub>2</sub> |                               | Space group : $R\bar{3}m$      |                                | Lithiated for 10 h                 |                  |                     |
|-----------------------------------------------------------------------------|-------------------------------|--------------------------------|--------------------------------|------------------------------------|------------------|---------------------|
| <i>a</i> -axis: 2.8726 (1) Å                                                |                               | <i>c</i> -axis: 14.1896 (2) Å  |                                | Volume: 101.403 (1) Å <sup>3</sup> |                  |                     |
| <i>R<sub>p</sub></i> : 2.81%                                                | <i>R<sub>wp</sub></i> : 3.21% | <i>R<sub>exp</sub></i> : 2.11% | <i>Chi</i> <sup>2</sup> : 3.12 |                                    |                  |                     |
| Atom                                                                        | Wyckoff position              | x                              | y                              | z                                  | B <sub>iso</sub> | *Modified occupancy |
| Li1                                                                         | 3a                            | 0                              | 0                              | 0                                  | 1.200            | 0.987               |
| Ni2                                                                         | 3a                            | 0                              | 0                              | 0                                  | 1.200            | 0.013               |
| Ni1                                                                         | 3b                            | 0                              | 0                              | 0.5                                | 0.5050           | 0.937               |
| Co1                                                                         | 3b                            | 0                              | 0                              | 0.5                                | 0.5050           | <sup>a)</sup> 0.040 |
| Al1                                                                         | 3b                            | 0                              | 0                              | 0.5                                | 0.5050           | <sup>a)</sup> 0.010 |
| Li2                                                                         | 3b                            | 0                              | 0                              | 0.5                                | 0.5050           | 0.013               |
| O1                                                                          | 6c                            | 0                              | 0                              | 0.2417 (2)                         | 0.7750           | 2                   |

3

| Li[Ni <sub>0.95</sub> Co <sub>0.04</sub> Al <sub>0.01</sub> ]O <sub>2</sub> |                               | Space group : $R\bar{3}m$      |                                | Lithiated for 20 h                 |                  |                     |
|-----------------------------------------------------------------------------|-------------------------------|--------------------------------|--------------------------------|------------------------------------|------------------|---------------------|
| <i>a</i> -axis: 2.8729 (2) Å                                                |                               | <i>c</i> -axis: 14.1885 (1) Å  |                                | Volume: 101.416 (4) Å <sup>3</sup> |                  |                     |
| <i>R<sub>p</sub></i> : 2.77%                                                | <i>R<sub>wp</sub></i> : 3.27% | <i>R<sub>exp</sub></i> : 2.12% | <i>Chi</i> <sup>2</sup> : 3.11 |                                    |                  |                     |
| Atom                                                                        | Wyckoff position              | x                              | y                              | z                                  | B <sub>iso</sub> | *Modified occupancy |
| Li1                                                                         | 3a                            | 0                              | 0                              | 0                                  | 1.200            | 0.990               |
| Ni2                                                                         | 3a                            | 0                              | 0                              | 0                                  | 1.200            | 0.010               |
| Ni1                                                                         | 3b                            | 0                              | 0                              | 0.5                                | 0.5050           | 0.940               |
| Co1                                                                         | 3b                            | 0                              | 0                              | 0.5                                | 0.5050           | <sup>a)</sup> 0.040 |
| Al1                                                                         | 3b                            | 0                              | 0                              | 0.5                                | 0.5050           | <sup>a)</sup> 0.010 |
| Li2                                                                         | 3b                            | 0                              | 0                              | 0.5                                | 0.5050           | 0.010               |
| O1                                                                          | 6c                            | 0                              | 0                              | 0.2417 (1)                         | 0.7750           | 2                   |

4

5

6

7

|                                                                             |                               |                                |                                |                                    |  |
|-----------------------------------------------------------------------------|-------------------------------|--------------------------------|--------------------------------|------------------------------------|--|
| Li[Ni <sub>0.95</sub> Co <sub>0.04</sub> Al <sub>0.01</sub> ]O <sub>2</sub> |                               | Space group : $R\bar{3}m$      |                                | Lithiated for 30 h                 |  |
| <i>a</i> -axis: 2.8734 (3) Å                                                |                               | <i>c</i> -axis: 14.1871 (1) Å  |                                | Volume: 101.442 (4) Å <sup>3</sup> |  |
| <i>R<sub>p</sub></i> : 2.75%                                                | <i>R<sub>wp</sub></i> : 3.41% | <i>R<sub>exp</sub></i> : 2.11% | <i>Chi</i> <sup>2</sup> : 3.11 |                                    |  |

| Atom | Wyckoff position | x | y | z          | B <sub>iso</sub> | *Modified occupancy |
|------|------------------|---|---|------------|------------------|---------------------|
| Li1  | 3a               | 0 | 0 | 0          | 1.200            | 0.993               |
| Ni2  | 3a               | 0 | 0 | 0          | 1.200            | 0.007               |
| Ni1  | 3b               | 0 | 0 | 0.5        | 0.5050           | 0.943               |
| Co1  | 3b               | 0 | 0 | 0.5        | 0.5050           | <sup>a)</sup> 0.040 |
| Al1  | 3b               | 0 | 0 | 0.5        | 0.5050           | <sup>a)</sup> 0.010 |
| Li2  | 3b               | 0 | 0 | 0.5        | 0.5050           | 0.007               |
| O1   | 6c               | 0 | 0 | 0.2411 (3) | 0.7750           | 2                   |

1

|                                                                             |                               |                                |                                |                                    |  |
|-----------------------------------------------------------------------------|-------------------------------|--------------------------------|--------------------------------|------------------------------------|--|
| Li[Ni <sub>0.95</sub> Co <sub>0.04</sub> Al <sub>0.01</sub> ]O <sub>2</sub> |                               | Space group : $R\bar{3}m$      |                                | Lithiated for 60 h                 |  |
| <i>a</i> -axis: 2.8737 (1) Å                                                |                               | <i>c</i> -axis: 14.1863 (2) Å  |                                | Volume: 101.457 (1) Å <sup>3</sup> |  |
| <i>R<sub>p</sub></i> : 2.71%                                                | <i>R<sub>wp</sub></i> : 3.33% | <i>R<sub>exp</sub></i> : 2.11% | <i>Chi</i> <sup>2</sup> : 3.11 |                                    |  |

| Atom | Wyckoff position | x | y | z          | B <sub>iso</sub> | *Modified occupancy |
|------|------------------|---|---|------------|------------------|---------------------|
| Li1  | 3a               | 0 | 0 | 0          | 1.200            | 0.992               |
| Ni2  | 3a               | 0 | 0 | 0          | 1.200            | 0.008               |
| Ni1  | 3b               | 0 | 0 | 0.5        | 0.5050           | 0.942               |
| Co1  | 3b               | 0 | 0 | 0.5        | 0.5050           | <sup>a)</sup> 0.040 |
| Al1  | 3b               | 0 | 0 | 0.5        | 0.5050           | <sup>a)</sup> 0.010 |
| Li2  | 3b               | 0 | 0 | 0.5        | 0.5050           | 0.008               |
| O1   | 6c               | 0 | 0 | 0.2418 (1) | 0.7750           | 2                   |

2 \*Modified occ. = occupation \*12 for Fullprof (occ.\*12)

3 <sup>a)</sup> Fixed value

5  
4

1 **Table S3.** Structural parameters determined by Rietveld refinement of the X-ray diffraction data of  
 2 NCMo95 cathodes lithiated at 700 °C for 10, 20, 30, and 60 h.

| Li[Ni <sub>0.95</sub> Co <sub>0.04</sub> Mo <sub>0.01</sub> ]O <sub>2</sub> |                               | Space group : $R\bar{3}m$      |                                | Lithiated for 10 h                 |                  |                     |
|-----------------------------------------------------------------------------|-------------------------------|--------------------------------|--------------------------------|------------------------------------|------------------|---------------------|
| <i>a</i> -axis: 2.8751 (3) Å                                                |                               | <i>c</i> -axis: 14.1985 (1) Å  |                                | Volume: 101.643 (4) Å <sup>3</sup> |                  |                     |
| <i>R<sub>p</sub></i> : 3.33%                                                | <i>R<sub>wp</sub></i> : 4.27% | <i>R<sub>exp</sub></i> : 3.45% | <i>Chi</i> <sup>2</sup> : 1.53 |                                    |                  |                     |
| Atom                                                                        | Wyckoff position              | x                              | y                              | z                                  | B <sub>iso</sub> | *Modified occupancy |
| Li1                                                                         | 3a                            | 0                              | 0                              | 0                                  | 1.200            | 0.976               |
| Ni2                                                                         | 3a                            | 0                              | 0                              | 0                                  | 1.200            | 0.024               |
| Ni1                                                                         | 3b                            | 0                              | 0                              | 0.5                                | 0.5050           | 0.926               |
| Co1                                                                         | 3b                            | 0                              | 0                              | 0.5                                | 0.5050           | <sup>a</sup> )0.040 |
| Mo1                                                                         | 3b                            | 0                              | 0                              | 0.5                                | 0.5050           | <sup>a</sup> )0.010 |
| Li2                                                                         | 3b                            | 0                              | 0                              | 0.5                                | 0.5050           | 0.024               |
| O1                                                                          | 6c                            | 0                              | 0                              | 0.2419 (1)                         | 0.7750           | 2                   |

3

| Li[Ni <sub>0.95</sub> Co <sub>0.04</sub> Mo <sub>0.01</sub> ]O <sub>2</sub> |                               | Space group : $R\bar{3}m$      |                                | Lithiated for 20 h                 |                  |                     |
|-----------------------------------------------------------------------------|-------------------------------|--------------------------------|--------------------------------|------------------------------------|------------------|---------------------|
| <i>a</i> -axis: 2.8756 (1) Å                                                |                               | <i>c</i> -axis: 14.1927 (1) Å  |                                | Volume: 101.637 (2) Å <sup>3</sup> |                  |                     |
| <i>R<sub>p</sub></i> : 3.27%                                                | <i>R<sub>wp</sub></i> : 4.24% | <i>R<sub>exp</sub></i> : 3.37% | <i>Chi</i> <sup>2</sup> : 1.51 |                                    |                  |                     |
| Atom                                                                        | Wyckoff position              | x                              | y                              | z                                  | B <sub>iso</sub> | *Modified occupancy |
| Li1                                                                         | 3a                            | 0                              | 0                              | 0                                  | 1.200            | 0.977               |
| Ni2                                                                         | 3a                            | 0                              | 0                              | 0                                  | 1.200            | 0.023               |
| Ni1                                                                         | 3b                            | 0                              | 0                              | 0.5                                | 0.5050           | 0.927               |
| Co1                                                                         | 3b                            | 0                              | 0                              | 0.5                                | 0.5050           | <sup>a</sup> )0.040 |
| Mo1                                                                         | 3b                            | 0                              | 0                              | 0.5                                | 0.5050           | <sup>a</sup> )0.010 |
| Li2                                                                         | 3b                            | 0                              | 0                              | 0.5                                | 0.5050           | 0.023               |
| O1                                                                          | 6c                            | 0                              | 0                              | 0.2419 (2)                         | 0.7750           | 2                   |

4

5

6

7

|                                                                             |                               |                                |                                |                                    |  |  |
|-----------------------------------------------------------------------------|-------------------------------|--------------------------------|--------------------------------|------------------------------------|--|--|
| Li[Ni <sub>0.95</sub> Co <sub>0.04</sub> Mo <sub>0.01</sub> ]O <sub>2</sub> |                               | Space group : $R\bar{3}m$      |                                | Lithiated for 30 h                 |  |  |
| <i>a</i> -axis: 2.8759 (2) Å                                                |                               | <i>c</i> -axis: 14.1889 (1) Å  |                                | Volume: 101.631 (2) Å <sup>3</sup> |  |  |
| <i>R<sub>p</sub></i> : 2.61%                                                | <i>R<sub>wp</sub></i> : 3.48% | <i>R<sub>exp</sub></i> : 2.19% | <i>Chi</i> <sup>2</sup> : 2.52 |                                    |  |  |

| Atom | Wyckoff position | x | y | z          | B <sub>iso</sub> | *Modified occupancy |
|------|------------------|---|---|------------|------------------|---------------------|
| Li1  | 3a               | 0 | 0 | 0          | 1.200            | 0.978               |
| Ni2  | 3a               | 0 | 0 | 0          | 1.200            | 0.022               |
| Ni1  | 3b               | 0 | 0 | 0.5        | 0.5050           | 0.928               |
| Co1  | 3b               | 0 | 0 | 0.5        | 0.5050           | <sup>a)</sup> 0.040 |
| Mo1  | 3b               | 0 | 0 | 0.5        | 0.5050           | <sup>a)</sup> 0.010 |
| Li2  | 3b               | 0 | 0 | 0.5        | 0.5050           | 0.022               |
| O1   | 6c               | 0 | 0 | 0.2419 (4) | 0.7750           | 2                   |

1

|                                                                             |                               |                                |                                |                                    |  |  |
|-----------------------------------------------------------------------------|-------------------------------|--------------------------------|--------------------------------|------------------------------------|--|--|
| Li[Ni <sub>0.95</sub> Co <sub>0.04</sub> Mo <sub>0.01</sub> ]O <sub>2</sub> |                               | Space group : $R\bar{3}m$      |                                | Lithiated for 60 h                 |  |  |
| <i>a</i> -axis: 2.8761 (3) Å                                                |                               | <i>c</i> -axis: 14.1861 (1) Å  |                                | Volume: 101.625 (2) Å <sup>3</sup> |  |  |
| <i>R<sub>p</sub></i> : 2.81%                                                | <i>R<sub>wp</sub></i> : 3.72% | <i>R<sub>exp</sub></i> : 3.11% | <i>Chi</i> <sup>2</sup> : 1.64 |                                    |  |  |

| Atom | Wyckoff position | x | y | z          | B <sub>iso</sub> | *Modified occupancy |
|------|------------------|---|---|------------|------------------|---------------------|
| Li1  | 3a               | 0 | 0 | 0          | 1.200            | 0.978               |
| Ni2  | 3a               | 0 | 0 | 0          | 1.200            | 0.022               |
| Ni1  | 3b               | 0 | 0 | 0.5        | 0.5050           | 0.928               |
| Co1  | 3b               | 0 | 0 | 0.5        | 0.5050           | <sup>a)</sup> 0.040 |
| Mo1  | 3b               | 0 | 0 | 0.5        | 0.5050           | <sup>a)</sup> 0.010 |
| Li2  | 3b               | 0 | 0 | 0.5        | 0.5050           | 0.022               |
| O1   | 6c               | 0 | 0 | 0.2419 (4) | 0.7750           | 2                   |

2 \*Modified occ. = occupation \*12 for Fullprof (occ.\*12)

3 <sup>a)</sup> Fixed value
